# Supplementary material
Source: publisher figshare collection journal article supplement (https://tandf.figshare.com/ndownloader/files/14135138)
Supplement: Supplementary file 1 [file 14135138]

Table S1 Comparison of the overall survival time (month) among treatments given sides of primary tumor sites.

| Side of primary tumor sites / treatments | All  (n = 15,510) | Group 1  (n = 11,766) | Group 2  (n = 3,601) | Group 3  (n = 143) |
| --- | --- | --- | --- | --- |
| Total |  |  |  |  |
| No treatment | 6 (5.6 , 6.4) | 6 (5.5 , 6.5) | 6 (5.3 , 6.7) | 3 (1.3 , 4.7) |
| Surgery alone | 14 (12.6 , 15.4) | 16 (14.2 , 17.8) | 12 (10 , 14) | 3 (0.4 , 5.6) |
| Radiation alone | 21 (20.2 , 21.8) | 22 (21 , 23) | 15 (13.2 , 16.8) | 3 (1.2 , 4.8) |
| Surgery & radiation | 36 (31.7 , 40.3) | 40 (34.9 , 45.1) | 18 (15.4 , 20.6) | 11 (0 , 23.3) |
| p-value | **<.001** | **<.001** | **<.001** | 0.218 |
|  |  |  |  |  |
| Right side |  |  |  |  |
| No treatment | 5 (4.5 , 5.5) | 5 (4.3 , 5.7) | 4 (3 , 5) | 3 (0 , 6.7) |
| Surgery alone | 6 (1.8 , 10.2) | 8 (4.2 , 11.8) | 4 (0 , 8.1) | 3 (1 , 5) |
| Radiation alone | 16 (15 , 17) | 17 (15.9 , 18.1) | 13 (11.3 , 14.7) | 3 (1.9 , 4.1) |
| Surgery & radiation | 14 (10.9 , 17.1) | 14 (10.4 , 17.6) | 17 (6.7 , 27.3) | 11 (0 , 23) |
| p-value | **<.001** | **<.001** | **<.001** | 0.544 |
| Left side |  |  |  |  |
| No treatment | 8 (7.1 , 8.9) | 8 (6.9 , 9.1) | 7 (5.5 , 8.5) | ND |
| Surgery alone | 11 (8.4 , 13.6) | 15 (10.3 , 19.7) | 9 (4.6 , 13.4) | ND |
| Radiation alone | 27 (25.6 , 28.4) | 29 (27.4 , 30.6) | 19 (16.4 , 21.6) | ND |
| Surgery & radiation | 40 (31.6 , 48.4) | 35 (32.4 , 38.0)a | 17 (9.3 , 24.7) | ND |
| p-value | **<.001** | **<.001** | **<.001** | NA |
| Rectal |  |  |  |  |
| No treatment | 12 (10.6 , 13.4) | 13 (11.1 , 14.9) | 12 (10 , 14) | ND |
| Surgery alone | 16 (14.5 , 17.5) | 18 (16.1 , 19.9) | 14 (11.6 , 16.4) | ND |
| Radiation alone | 26 (23.6 , 28.4) | 29 (25.7 , 32.3) | 17 (10.4 , 23.6) | ND |
| Surgery & radiation | 36 (29.7 , 42.3) | 34.8 (32.9 , 36.6)a | 23 (14.6 , 31.4) | ND |
| p-value | **<.001** | **<.001** | **0.008** | NA |
| Colon, NOS |  |  |  |  |
| No treatment | 2 (1.7 , 2.3) | 2 (1.5 , 2.5) | 2 (1.5 , 2.5) | 1 (0 , 2.3) |
| Surgery alone | 4 (0.5 , 7.5) | 4 (0 , 9.1) | 8 (2.6 , 13.4) | 7 (0, 16.1)a |
| Radiation alone | 15 (10.1 , 19.9) | 17 (11.8 , 22.2) | 12 (9 , 15) | ND |
| Surgery & radiation | 22 (0.9 , 42.1)a | 22 (0.9 , 42.1)a | ND | ND |
| p-value | **<.001** | **<.001** | **<.001** | 0.756 |

Results were summarized as median (95%CI of median), months.

a mean (95%CI of mean) were represented because more than 50% patients alive.

Log-rank test was performed to compare the OS time among treatments.

ND, not derived. NA, not assessed. NOS, no other specified.

Bold value indicated significantly different.
